# Supplementary material for: Exosomes from Gastric Cancer Suppressed Adipo-differentiation of Adipose Mesenchymal Stem Cells to Promote Cancer-associated Cachexia via miR-155/ C/EPBβ pathway
Source: Research Square preprint supplement (doi:10.21203/rs.3.rs-103656/v1), 2020-11-12
Supplement: Supplementary file 1 [file aa46025f3601558efa395465.docx]

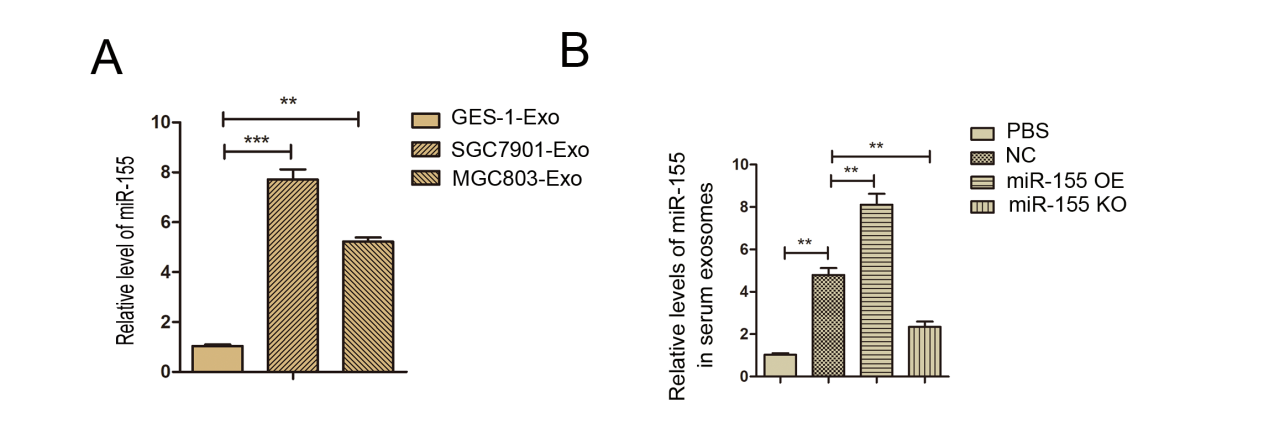


**Figure S-1**

**Figure S-1.**

(A) Relative levels of miR-155 in GC exosome. (B) Relative levels of miR-155 in serum exosome of mice
